# Supplementary material
Source: PubMed Central journal article supplement (PMC4384505)

Supplement Figure 1.

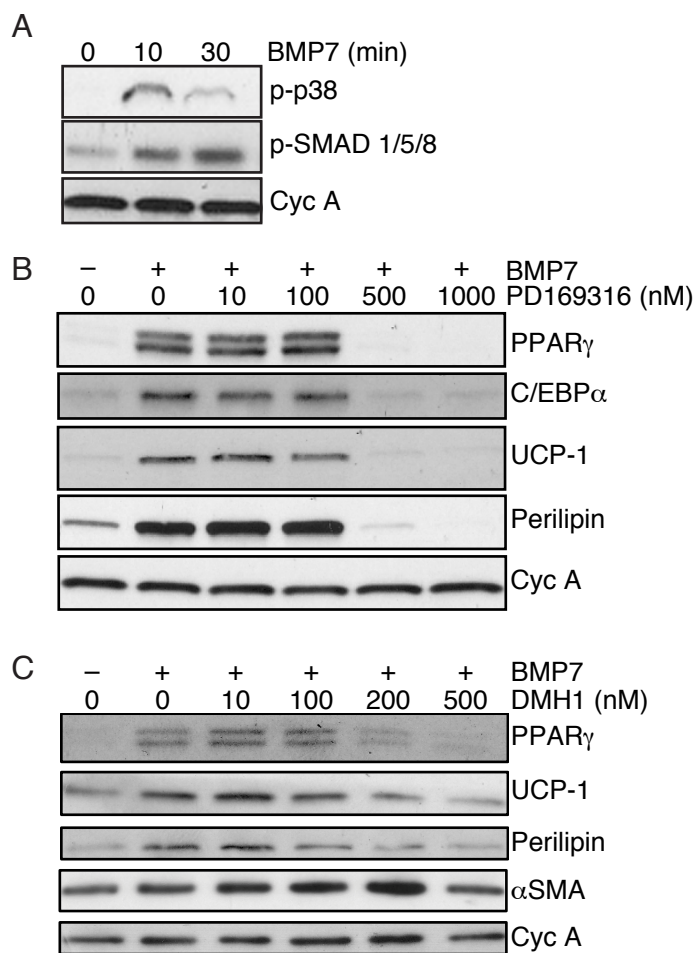

Supplement: NIHMS646781-supplement-2.pdf [file NIHMS646781-supplement-2.pdf]

Supplement Figure 2.

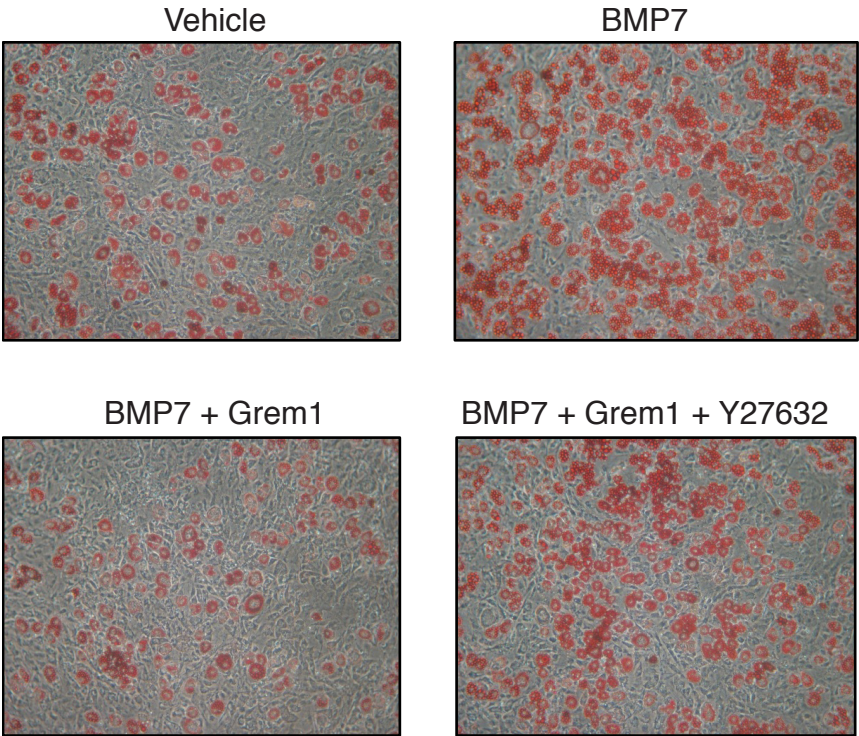

Supplement: NIHMS646781-supplement-3.pdf [file NIHMS646781-supplement-3.pdf]

Supplement Figure 3.

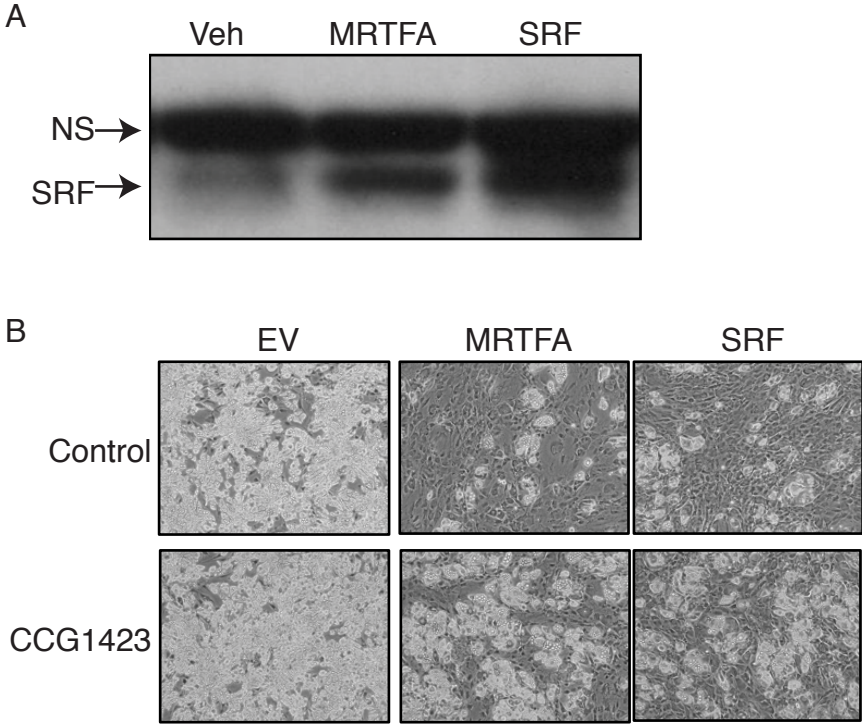

Supplement: NIHMS646781-supplement-4.pdf [file NIHMS646781-supplement-4.pdf]

Supplement Figure 4.

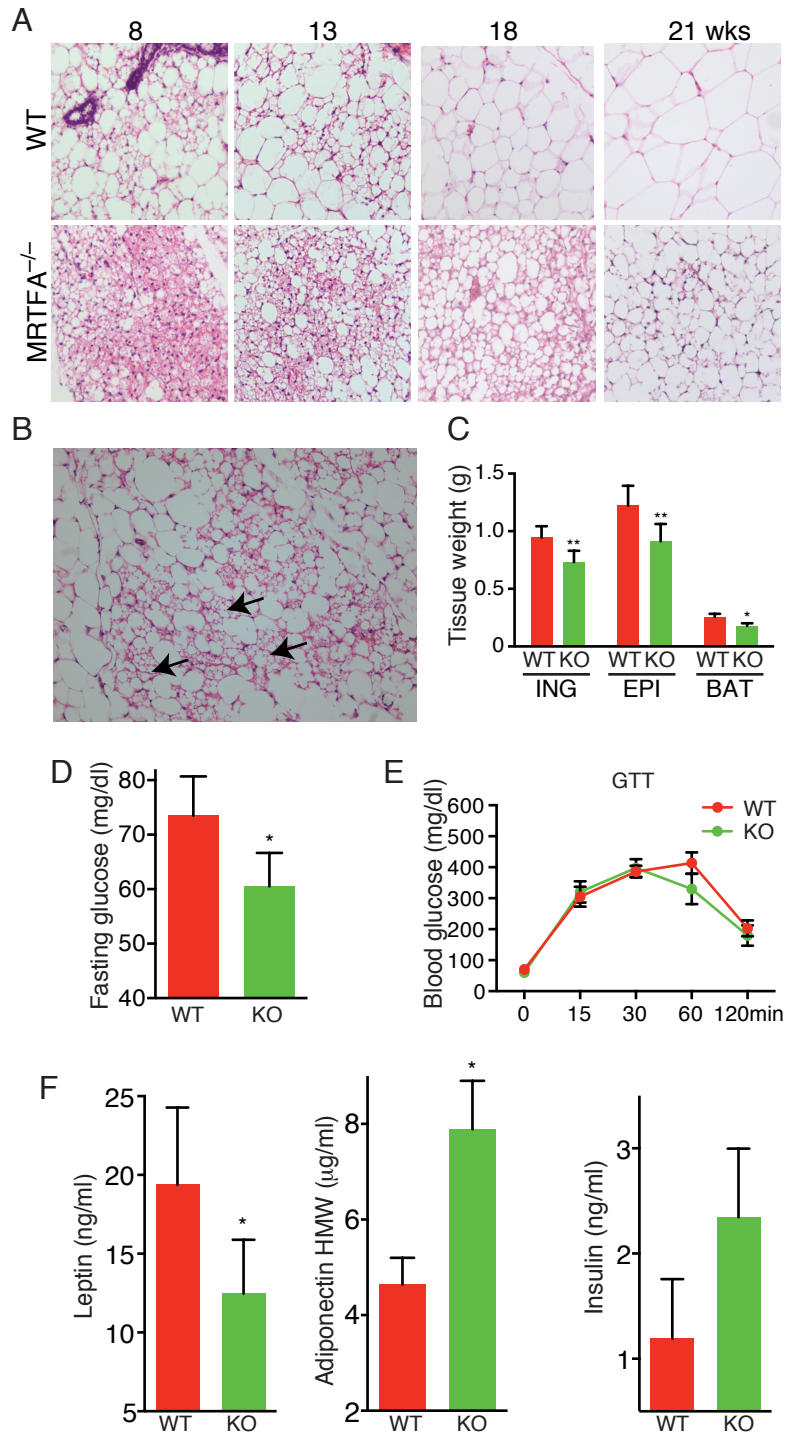

Supplement: NIHMS646781-supplement-5.pdf [file NIHMS646781-supplement-5.pdf]

Supplement Figure 5.

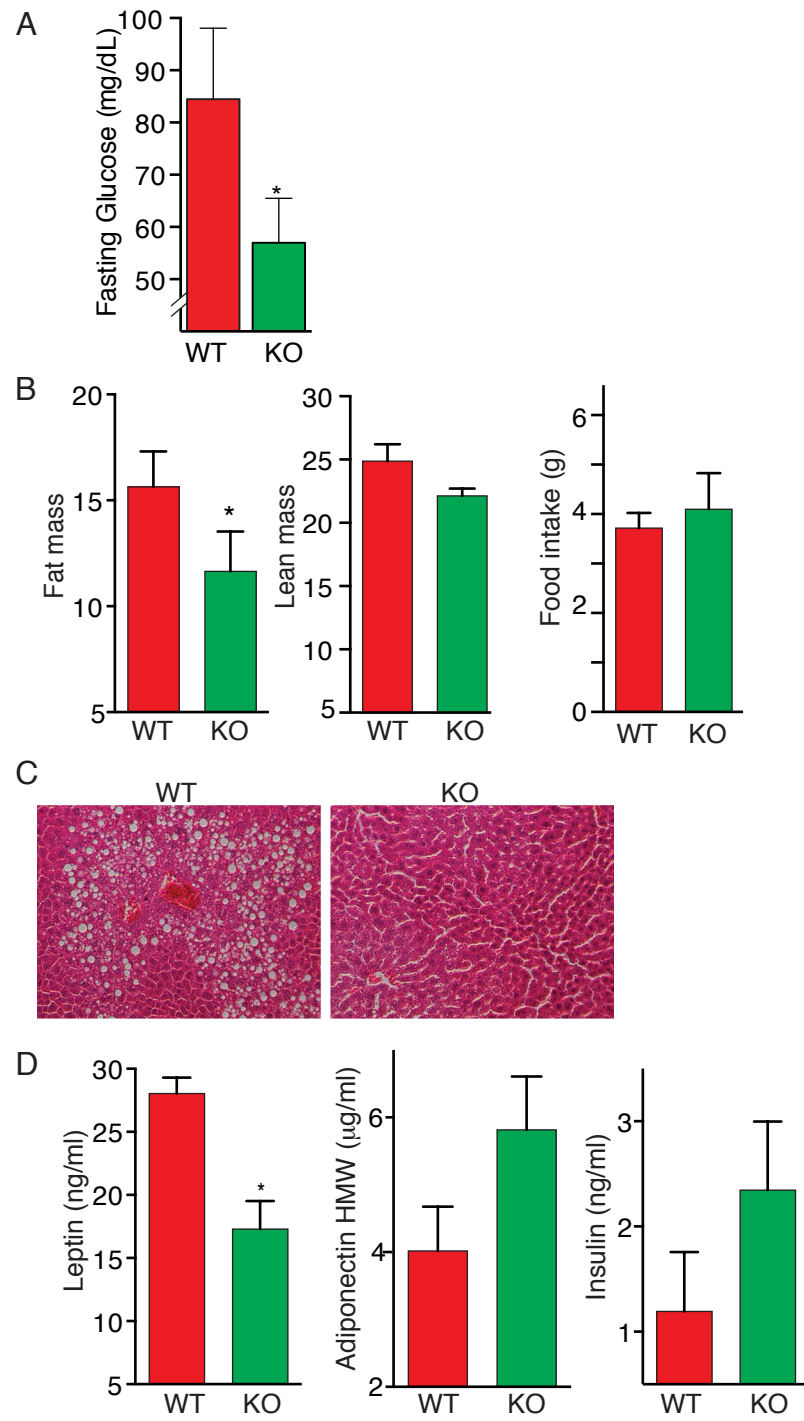

Supplement: NIHMS646781-supplement-6.pdf [file NIHMS646781-supplement-6.pdf]

Supplement Figure 6.

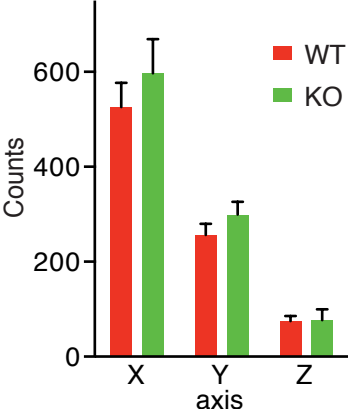

Supplement: NIHMS646781-supplement-7.pdf [file NIHMS646781-supplement-7.pdf]
